# Supplementary material for: Efficacy and Safety of Sodium-Glucose Cotransporter-2 Inhibitors in Korean Patients with Type 2 Diabetes Mellitus in Real-World Clinical Practice
Source: PubMed Central journal article supplement — Diabetes Metab J. 2019 Feb 28;43(5):590–606. doi: 10.4093/dmj.2018.0134 (PMC6834827; doi:10.4093/dmj.2018.0134), 2019-02-28
Supplement: dmj-43-590-s001.pdf [file dmj-43-590-s001.pdf]

**Supplementary Table 1.** Changes in FPG, lipid profiles, body weight, and blood pressure after 12 weeks of treatment with sodium-glucose co-transporter-2 inhibitors as add-on therapy

| Variable                     | Baseline   | Week 12    | LS mean change from baseline<br>(95% CI) | Difference in LS mean change<br>(95% CI) <sup>a</sup> |
|------------------------------|------------|------------|------------------------------------------|-------------------------------------------------------|
| <b>FPG, mg/dL</b>            |            |            |                                          |                                                       |
| Add-on ( <i>n</i> =207)      | 164.8±2.9  | 128.5±2.2  | -30.3 (-34.6 to -26.1) <sup>b</sup>      | -                                                     |
| MET ( <i>n</i> =58)          | 159.2±4.0  | 132.3±2.5  | -31.1 (-39.0 to -23.2) <sup>b</sup>      | -                                                     |
| MET+SU ( <i>n</i> =19)       | 161.5±6.8  | 133.1±4.9  | -30.9 (-44.7 to -17.1) <sup>b</sup>      | -0.2 (-21.7 to 21.3)                                  |
| MET+SU+DPP4i ( <i>n</i> =52) | 172.0±4.9  | 131.8±4.3  | -34.7 (-43.1 to -26.4) <sup>b</sup>      | 3.6 (-12.0 to 19.3)                                   |
| Insulin ( <i>n</i> =78)      | 164.9±6.2  | 122.5±4.7  | -42.3 (-49.1 to -35.5) <sup>b</sup>      | 11.2 (-3.0 to 25.3)                                   |
| <b>TG, mg/dL</b>             |            |            |                                          |                                                       |
| Add-on ( <i>n</i> =207)      | 160.8±8.1  | 141.0±5.3  | -17.8 (-25.6 to -9.9) <sup>b</sup>       | -                                                     |
| MET ( <i>n</i> =58)          | 177.4±19.7 | 140.8±11.4 | -26.8 (-42.0 to -11.7) <sup>b</sup>      | -                                                     |
| MET+SU ( <i>n</i> =19)       | 139.5±11.4 | 151.3±18.6 | -0.7 (-28.8 to 27.4)                     | -26.1 (-69.3 to 17.1)                                 |
| MET+SU+DPP4i ( <i>n</i> =52) | 148.0±14.8 | 132.8±8.6  | -22.7 (-39.3 to -6.2)                    | -4.1 (-34.5 to 26.3)                                  |
| Insulin ( <i>n</i> =78)      | 160.9±12.2 | 143.9±8.4  | -16.9 (-29.9 to -3.8) <sup>b</sup>       | -10.0 (-37.0 to 17.1)                                 |
| <b>HDL-C, mg/dL</b>          |            |            |                                          |                                                       |
| Add-on ( <i>n</i> =207)      | 45.7±0.8   | 46.4±0.7   | 0.8 (-0.2 to 1.7)                        | -                                                     |
| MET ( <i>n</i> =58)          | 46.2±1.5   | 48.5±1.1   | 2.5 (0.7 to 4.3) <sup>b</sup>            | -                                                     |
| MET+SU ( <i>n</i> =19)       | 48.9±2.4   | 49.0±2.2   | 1.3 (-2.0 to 4.7)                        | 1.2 (-4.0 to 6.3)                                     |
| MET+SU+DPP4i ( <i>n</i> =52) | 43.2±1.9   | 43.4±1.4   | -0.8 (-2.8 to 1.2)                       | 3.3 (-0.3 to 6.9)                                     |
| Insulin ( <i>n</i> =78)      | 46.2±1.2   | 46.1±1.2   | 0.0 (-1.5 to 1.5)                        | 2.5 (-0.8 to 5.7)                                     |
| <b>LDL-C, mg/dL</b>          |            |            |                                          |                                                       |
| Add-on ( <i>n</i> =207)      | 81.6±1.6   | 81.0±1.7   | 0.9 (-3.7 to 1.9)                        | -                                                     |
| MET ( <i>n</i> =58)          | 84.2±3.4   | 87.0±3.4   | 3.9 (-1.4 to 9.2)                        | -                                                     |
| MET+SU ( <i>n</i> =19)       | 76.3±4.4   | 72.8±3.0   | -5.9 (-15.6 to 3.9)                      | 9.7 (-5.2 to 24.7)                                    |
| MET+SU+DPP4i ( <i>n</i> =52) | 82.3±2.7   | 79.0±3.0   | -3.0 (-8.7 to 2.7)                       | 6.9 (-3.6 to 17.4)                                    |
| Insulin ( <i>n</i> =78)      | 80.4±2.7   | 79.7±3.0   | -1.3 (-5.8 to 3.2)                       | 5.2 (-4.2 to 14.6)                                    |
| <b>Body weight, kg</b>       |            |            |                                          |                                                       |
| Add-on ( <i>n</i> =207)      | 74.1±1.5   | 72.3±1.5   | -1.9 (-2.4 to -1.5) <sup>b</sup>         | -                                                     |
| MET ( <i>n</i> =58)          | 79.2±3.0   | 77.2±2.9   | -1.8 (-2.6 to -1.0) <sup>b</sup>         | -                                                     |
| MET+SU ( <i>n</i> =19)       | 69.6±5.5   | 68.0±5.2   | -1.7 (-3.4 to -0.1) <sup>b</sup>         | -0.1 (-2.5 to 2.4)                                    |
| MET+SU+DPP4i ( <i>n</i> =52) | 73.2±2.8   | 71.5±2.5   | -2.1 (-2.9 to -1.3) <sup>b</sup>         | 0.3 (-1.3 to 1.9)                                     |
| Insulin ( <i>n</i> =78)      | 71.2±2.3   | 69.5±2.3   | -1.9 (-2.7 to -1.1) <sup>b</sup>         | 0.1 (-1.4 to 1.6)                                     |
| <b>SBP, mm Hg</b>            |            |            |                                          |                                                       |
| Add-on ( <i>n</i> =207)      | 131.3±1.0  | 126.5±1.0  | -4.2 (-5.9 to -2.6) <sup>b</sup>         | -                                                     |
| MET ( <i>n</i> =58)          | 133.5±1.9  | 129.7±1.9  | -2.7 (-5.7 to 0.3)                       | -                                                     |
| MET+SU ( <i>n</i> =19)       | 127.4±2.7  | 122.1±2.7  | -7.3 (-12.4 to -2.1)                     | 4.6 (-3.6 to 12.7)                                    |
| MET+SU+DPP4i ( <i>n</i> =52) | 127.2±2.0  | 124.5±1.9  | -4.7 (-8.1 to -1.3)                      | 2.0 (-4.2 to 8.2)                                     |
| Insulin ( <i>n</i> =78)      | 133.3±1.7  | 126.3±1.6  | -6.0 (-8.7 to -3.3) <sup>b</sup>         | 3.3 (-2.1 to 8.8)                                     |
| <b>DBP, mm Hg</b>            |            |            |                                          |                                                       |
| Add-on ( <i>n</i> =207)      | 78.4±0.7   | 77.1±1.0   | -1.0 (-2.5 to 0.4)                       | -                                                     |
| MET ( <i>n</i> =58)          | 83.0±1.2   | 83.4±2.5   | 1.9 (-1.3 to 5.2)                        | -                                                     |
| MET+SU ( <i>n</i> =19)       | 77.8±2.5   | 76.8±2.8   | -1.3 (-6.6 to 4.1)                       | 3.2 (-5.2 to 11.7)                                    |
| MET+SU+DPP4i ( <i>n</i> =52) | 78.1±1.3   | 76.7±1.4   | -1.6 (-5.1 to 2.0)                       | 3.5 (-3.0 to 10.0)                                    |
| Insulin ( <i>n</i> =78)      | 75.7±1.2   | 72.7±1.2   | -4.1 (-6.9 to -1.2) <sup>b</sup>         | 6.0 (0.0 to 12.0)                                     |

Values are presented as mean ± standard error.

FPG, fasting plasma glucose; LS, least square; CI, confidence interval; MET, metformin; SU, sulfonylurea; DPP4i, dipeptidyl peptidase 4 inhibitor; TG, triglyceride; HDL-C, high density lipoprotein cholesterol; LDL-C, low density lipoprotein cholesterol; SBP, systolic blood pressure; DBP, diastolic blood pressure.

<sup>a</sup>Difference in the LS mean change, which was calculated as compared to adding MET in add-on group and switching from DPP4i in switch group,

<sup>b</sup>*P*<0.05 from baseline in overall patients and each treatment subgroup.
