# Supplementary material for: Efficacy and Safety of Sodium-Glucose Cotransporter-2 Inhibitors in Korean Patients with Type 2 Diabetes Mellitus in Real-World Clinical Practice
Source: PubMed Central journal article supplement — Diabetes Metab J. 2019 Feb 28;43(5):590–606. doi: 10.4093/dmj.2018.0134 (PMC6834827; doi:10.4093/dmj.2018.0134), 2019-02-28
Supplement: dmj-43-590-s002.pdf [file dmj-43-590-s002.pdf]

**Supplementary Table 2.** Changes in FPG, lipid profiles, body weight, and blood pressure after 12 weeks of treatment with sodium-glucose cotransporter-2 inhibitors as switch therapy

| Variable                | Baseline   | Week 12    | LS mean change from baseline (95% CI) | Difference in LS mean change (95% CI) <sup>a</sup> |
|-------------------------|------------|------------|---------------------------------------|----------------------------------------------------|
| <b>FPG, mg/dL</b>       |            |            |                                       |                                                    |
| Switch ( <i>n</i> =203) | 148.4±2.9  | 134.5±2.3  | -19.8 (-24.1 to -15.6) <sup>b</sup>   |                                                    |
| DPP4i ( <i>n</i> =114)  | 147.9±3.6  | 137.0±3.2  | -11.2 (-16.8 to -5.6) <sup>b</sup>    | -                                                  |
| SU ( <i>n</i> =54)      | 147.4±6.9  | 126.7±4.3  | -21.4 (-29.6 to -13.2) <sup>b</sup>   | 10.2 (-2.0 to 22.3)                                |
| TZD ( <i>n</i> =35)     | 151.3±5.4  | 138.5±5.3  | -10.8 (-21.0 to -0.6) <sup>b</sup>    | 0.4 (-14.6 to 13.8)                                |
| <b>TG, mg/dL</b>        |            |            |                                       |                                                    |
| Switch ( <i>n</i> =203) | 153.1±6.0  | 140.1±5.3  | -15.1 (-23.1 to -7.1) <sup>b</sup>    |                                                    |
| DPP4i ( <i>n</i> =114)  | 153.1±8.5  | 139.0±6.9  | -14.1 (-24.2 to -4.0) <sup>b</sup>    | -                                                  |
| SU ( <i>n</i> =54)      | 153.2±11.4 | 126.2±8.5  | -26.9 (-40.9 to -13.0) <sup>b</sup>   | 12.8 (-8.3 to 33.9)                                |
| TZD ( <i>n</i> =35)     | 153.0±12.7 | 166.3±14.5 | 13.3 (-4.5 to 31.1)                   | -27.4 (-52.5 to -2.4) <sup>c</sup>                 |
| <b>HDL-C, mg/dL</b>     |            |            |                                       |                                                    |
| Switch ( <i>n</i> =203) | 45.0±0.8   | 45.2±0.8   | 0.1 (-0.8 to 1.1)                     |                                                    |
| DPP4i ( <i>n</i> =114)  | 45.6±1.1   | 46.3±1.1   | 0.9 (-0.4 to 2.2)                     | -                                                  |
| SU ( <i>n</i> =54)      | 42.6±1.3   | 43.9±1.3   | 0.8 (-0.9 to 2.6)                     | -0.1 (-2.6 to 2.8)                                 |
| TZD ( <i>n</i> =35)     | 47.0±1.9   | 44.0±1.7   | -2.6 (-4.9 to -0.4) <sup>b</sup>      | 3.5 (-0.3 to 6.7)                                  |
| <b>LDL-C, mg/dL</b>     |            |            |                                       |                                                    |
| Switch ( <i>n</i> =203) | 83.2±1.9   | 80.0±1.9   | -2.9 (-5.8 to 0.1)                    |                                                    |
| DPP4i ( <i>n</i> =114)  | 83.9±2.7   | 82.5±2.6   | -1.2 (-5.1 to 2.8)                    | -                                                  |
| SU ( <i>n</i> =54)      | 77.3±3.6   | 72.4±3.4   | -7.0 (-12.5 to -1.6)                  | 5.9 (-2.3 to 14.1)                                 |
| TZD ( <i>n</i> =35)     | 90.8±3.8   | 84.6±4.8   | -3.5 (-10.4 to 3.4)                   | 2.4 (-7.4 to 12.1)                                 |
| <b>Body weight, kg</b>  |            |            |                                       |                                                    |
| Switch ( <i>n</i> =203) | 75.2±1.8   | 72.8±1.7   | -2.4 (-2.8 to -1.9) <sup>b</sup>      |                                                    |
| DPP4i ( <i>n</i> =114)  | 71.8±3.2   | 69.8±3.2   | -2.0 (-2.8 to -1.2) <sup>b</sup>      | -                                                  |
| SU ( <i>n</i> =54)      | 78.2±2.4   | 75.5±2.3   | -2.4 (-3.4 to -1.5) <sup>b</sup>      | 0.4 (-1.2 to 2.0)                                  |
| TZD ( <i>n</i> =35)     | 77.8±3.0   | 75.0±2.8   | -2.7 (-3.7 to -1.6) <sup>b</sup>      | 0.7 (-0.9 to 2.3)                                  |
| <b>SBP, mm Hg</b>       |            |            |                                       |                                                    |
| Switch ( <i>n</i> =203) | 128.8±1.0  | 124.2±1.0  | -5.3 (-7.0 to -3.6) <sup>b</sup>      |                                                    |
| DPP4i ( <i>n</i> =114)  | 128.5±1.4  | 124.5±1.3  | -4.2 (-6.4 to -2.0) <sup>b</sup>      | -                                                  |
| SU ( <i>n</i> =54)      | 130.5±1.8  | 125.2±1.9  | -4.3 (-7.8 to -0.9) <sup>b</sup>      | 0.1 (-4.9 to 5.1)                                  |
| TZD ( <i>n</i> =35)     | 127.2±3.0  | 121.3±2.1  | -6.8 (-11.3 to -2.3) <sup>b</sup>     | 2.6 (-3.6 to 8.8)                                  |
| <b>DBP, mm Hg</b>       |            |            |                                       |                                                    |
| Switch ( <i>n</i> =203) | 76.5±0.7   | 75.3±0.7   | -1.7 (-3.2 to -0.2)                   |                                                    |
| DPP4i ( <i>n</i> =114)  | 75.7±1.0   | 75.1±0.9   | -0.9 (-2.4 to 0.5)                    | -                                                  |
| SU ( <i>n</i> =54)      | 77.5±1.4   | 74.5±1.4   | -2.6 (-4.8 to -0.3) <sup>b</sup>      | 1.6 (-1.6 to 4.9)                                  |
| TZD ( <i>n</i> =35)     | 78.1±1.9   | 77.0±1.6   | -0.4 (-3.3 to 2.5)                    | -0.5 (-4.5 to 3.5)                                 |

Values are presented as mean ± standard error.

FPG, fasting plasma glucose; LS, least square; CI, confidence interval; DPP4i, dipeptidyl peptidase 4 inhibitor; SU, sulfonylurea; TZD, thiazolidinedione; TG, triglyceride; HDL-C, high density lipoprotein cholesterol; LDL-C, low density lipoprotein cholesterol; SBP, systolic blood pressure; DBP, diastolic blood pressure.

<sup>a</sup>Difference in the LS mean change, which was calculated as compared to adding MET in add-on group and switching from DPP4i in switch group, <sup>b</sup>*P*<0.05 from baseline in overall patients and each treatment subgroup, <sup>c</sup>*P*<0.05 for the between-treatment group difference.
