# Supplementary material for: Efficacy and Safety of Sodium-Glucose Cotransporter-2 Inhibitors in Korean Patients with Type 2 Diabetes Mellitus in Real-World Clinical Practice
Source: PubMed Central journal article supplement — Diabetes Metab J. 2019 Feb 28;43(5):590–606. doi: 10.4093/dmj.2018.0134 (PMC6834827; doi:10.4093/dmj.2018.0134), 2019-02-28
Supplement: dmj-43-590-s003.pdf [file dmj-43-590-s003.pdf]

**Supplementary Table 3.** Logistic regression analysis to determine variables associated with good responders to SGLT2 inhibitors in overall patients

| Variable                                   | Odds ratio | 95% CI    | P value |
|--------------------------------------------|------------|-----------|---------|
| Univariate                                 |            |           |         |
| Age, yr                                    | 0.99       | 0.97–1.00 | 0.125   |
| Female sex                                 | 1.06       | 0.71–1.58 | 0.772   |
| Body mass index, kg/m <sup>2</sup>         | 1.03       | 0.98–1.08 | 0.265   |
| Duration of diabetes, yr                   | 0.98       | 0.96–1.00 | 0.092   |
| Subtype of SGLT2 inhibitor (dapagliflozin) | 1.04       | 0.64–1.70 | 0.878   |
| Baseline HbA1c, %                          | 1.50       | 1.25–1.80 | <0.001  |
| Baseline FPG, mg/dL                        | 1.01       | 1.00–1.01 | 0.016   |
| Baseline HOMA- $\beta$                     | 1.00       | 0.98–1.03 | 0.667   |
| Baseline HOMA-IR                           | 1.44       | 0.96–2.17 | 0.077   |
| Baseline eGFR, mL/min/1.73 m <sup>2</sup>  | 1.01       | 1.00–1.02 | 0.139   |
| No insulin therapy                         | 1.56       | 1.03–2.35 | 0.035   |
| Multivariate                               |            |           |         |
| Baseline HbA1c, %                          | 1.84       | 1.48–2.29 | <0.001  |
| No insulin therapy                         | 2.91       | 1.77–4.78 | <0.001  |

SGLT2, sodium-glucose cotransporter-2; CI, confidence interval; HbA1c, glycosylated hemoglobin; FPG, fasting plasma glucose; HOMA- $\beta$ , homeostasis model assessment of  $\beta$ -cell function; HOMA-IR, homeostasis model assessment of insulin resistance; eGFR, estimated glomerular filtration rate.
