# Supplementary material for: Efficacy and Safety of Sodium-Glucose Cotransporter-2 Inhibitors in Korean Patients with Type 2 Diabetes Mellitus in Real-World Clinical Practice
Source: PubMed Central journal article supplement — Diabetes Metab J. 2019 Feb 28;43(5):590–606. doi: 10.4093/dmj.2018.0134 (PMC6834827; doi:10.4093/dmj.2018.0134), 2019-02-28
Supplement: dmj-43-590-s004.pdf [file dmj-43-590-s004.pdf]

**Supplementary Table 4.** Comparison of clinical characteristics between the good responders and the poor responders in the add-on and switch group

| Characteristic                                              | Add-on                    |                          |         | Switch                   |                           |         |
|-------------------------------------------------------------|---------------------------|--------------------------|---------|--------------------------|---------------------------|---------|
|                                                             | Good responder<br>(n=119) | Poor responder<br>(n=88) | P value | Good responder<br>(n=52) | Poor responder<br>(n=151) | P value |
| Age, yr                                                     | 58.8±11.5                 | 61.9±9.9                 | 0.047   | 48.0±13.4                | 59.5±12.4                 | 0.453   |
| Female sex                                                  | 67 (56.3)                 | 59 (67.0)                | 0.150   | 30 (57.7)                | 80 (53.0)                 | 0.629   |
| BMI, kg/m <sup>2</sup>                                      | 27.2±4.4                  | 26.7±3.7                 | 0.452   | 28.7±6.1                 | 27.2±4.9                  | 0.149   |
| Duration of diabetes, yr                                    | 11.4±8.3                  | 13.9±8.9                 | 0.034   | 10.6±7.9                 | 11.7±7.6                  | 0.387   |
| Subtype of SGLT2 inhibitors,<br>dapagliflozin:empagliflozin | 102:17                    | 77:11                    | 0.838   | 35:17                    | 113:38                    | 0.366   |
| Hypertension                                                | 89 (74.8)                 | 62 (70.5)                | 0.529   | 32 (61.5)                | 114 (75.5)                | 0.073   |
| Dyslipidemia                                                | 101 (84.9)                | 74 (84.1)                | 0.878   | 44 (84.6)                | 129 (85.4)                | 0.886   |
| HbA1c, %                                                    | 8.8±1.1                   | 8.3±1.0                  | 0.002   | 8.8±1.6                  | 8.2±1.1                   | 0.012   |
| FPG, mg/dL                                                  | 169.5±43.7                | 158.4±40.0               | 0.063   | 147.1±34.4               | 148.8±43.5                | 0.803   |
| Fasting C-peptide, ng/mL                                    | 2.6±1.7                   | 2.5±1.1                  | 0.728   | 2.5±1.3                  | 2.3±1.7                   | 0.825   |
| Fasting insulin, mIU/L                                      | 17.8±10.4                 | 12.9±3.0                 | 0.207   | NA                       | NA                        | NA      |
| HOMA-β                                                      | 73.9±49.1                 | 50.7±16.2                | 0.216   | NA                       | NA                        | NA      |
| HOMA-IR                                                     | 7.0±3.8                   | 5.0±1.1                  | 0.149   | NA                       | NA                        | NA      |
| eGFR, mL/min/1.73 m <sup>2</sup>                            | 93.3±25.3                 | 89.7±19.1                | 0.265   | 92.8±20.6                | 89.7±23.5                 | 0.411   |
| Insulin therapy                                             | 36 (30.3)                 | 42 (47.7)                | 0.014   | 18 (34.6)                | 58 (38.4)                 | 0.740   |

Values are presented as mean ± standard deviation or number (%).

BMI, body mass index; SGLT2, sodium-glucose cotransporter-2; HbA1c, glycosylated hemoglobin; FPG, fasting plasma glucose; NA, not applicable; HOMA-β, homeostasis model assessment of β-cell function; HOMA-IR, homeostasis model assessment of insulin resistance; eGFR, estimated glomerular filtration rate.
