# Supplementary material for: Efficacy and Safety of Sodium-Glucose Cotransporter-2 Inhibitors in Korean Patients with Type 2 Diabetes Mellitus in Real-World Clinical Practice
Source: PubMed Central journal article supplement — Diabetes Metab J. 2019 Feb 28;43(5):590–606. doi: 10.4093/dmj.2018.0134 (PMC6834827; doi:10.4093/dmj.2018.0134), 2019-02-28
Supplement: dmj-43-590-s005.pdf [file dmj-43-590-s005.pdf]

**Supplementary Table 5.** Logistic regression analysis to determine variables associated with good responders to SGLT2 inhibitors in the add-on and switch group

| Variable                                   | Add-on     |           |         | Switch     |           |         |
|--------------------------------------------|------------|-----------|---------|------------|-----------|---------|
|                                            | Odds ratio | 95% CI    | P value | Odds ratio | 95% CI    | P value |
| <b>Univariate</b>                          |            |           |         |            |           |         |
| Age, yr                                    | 0.97       | 0.95–1.00 | 0.049   | 0.99       | 0.97–1.02 | 0.451   |
| Female sex                                 | 1.58       | 0.89–2.80 | 0.118   | 0.83       | 0.44–1.57 | 0.557   |
| BMI, kg/m <sup>2</sup>                     | 1.03       | 0.95–1.11 | 0.451   | 1.05       | 0.98–1.13 | 0.154   |
| Duration of diabetes, yr                   | 0.97       | 0.93–1.00 | 0.036   | 0.98       | 0.94–1.03 | 0.386   |
| Subtype of SGLT2 inhibitor (dapagliflozin) | 0.86       | 0.38–1.94 | 0.711   | 0.69       | 0.35–1.38 | 0.692   |
| Baseline HbA1c, %                          | 1.53       | 1.16–2.02 | 0.003   | 1.44       | 1.12–1.84 | 0.004   |
| Baseline FPG, mg/dL                        | 1.01       | 1.00–1.01 | 0.065   | 1.00       | 1.00–1.01 | 0.802   |
| Baseline eGFR, mL/min/1.73 m <sup>2</sup>  | 1.01       | 0.99–1.02 | 0.267   | 1.01       | 0.99–1.02 | 0.410   |
| No insulin therapy                         | 2.11       | 1.19–3.73 | 0.011   | 1.18       | 0.61–2.28 | 0.626   |
| <b>Multivariate</b>                        |            |           |         |            |           |         |
| Age, yr                                    | 0.99       | 0.96–1.02 | 0.439   | 1.00       | 0.97–1.03 | 0.921   |
| Duration of diabetes, yr                   | 0.97       | 0.92–1.03 | 0.162   | 0.99       | 0.93–1.04 | 0.577   |
| Baseline HbA1c, %                          | 2.09       | 1.48–2.94 | <0.001  | 1.66       | 1.23–2.24 | 0.001   |
| No insulin therapy                         | 2.64       | 1.20–5.82 | 0.016   | 2.12       | 0.89–5.06 | 0.089   |

SGLT2, sodium-glucose cotransporter-2; CI, confidence interval; BMI, body mass index; HbA1c, glycosylated hemoglobin; FPG, fasting plasma glucose; eGFR, estimated glomerular filtration rate.
